# Supplementary material
Source: PubMed Central journal article supplement (PMC1383527)
Supplement: 7600942s1.pdf [file 7600942s1.pdf]

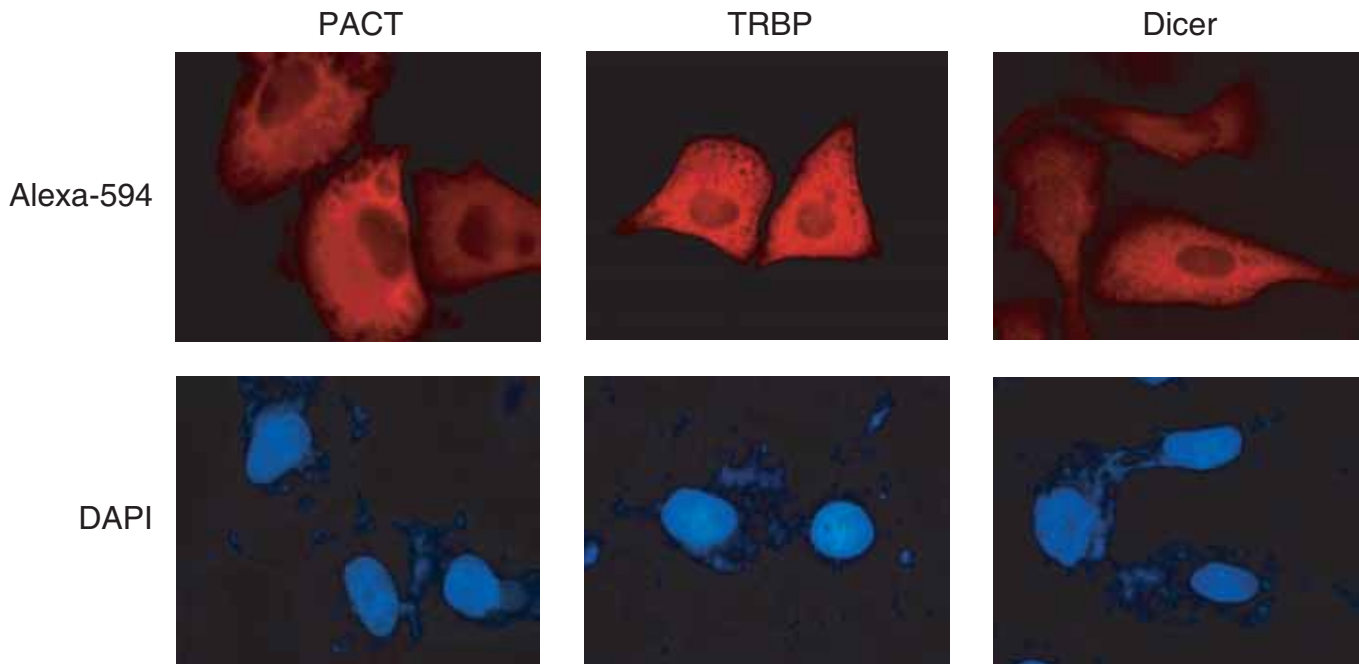

**Supplementary Figure 1. Subcellular localization of PACT, TRBP, and Dicer.**

Immunocytochemistry. HeLa cells were transiently transfected with V5-tagged PACT, TRBP, or Dicer, respectively. The upper panels show PACT, TRBP, or Dicer signals visualized with rabbit anti-V5 serum (1:500) and Alexa Flour 594 goat anti-rabbit IgG (1:400). The lower panels show DAPI staining of the nucleus.
